# Supplementary material for: Climate models exaggerate the impact of greenhouse gases on recent interhemispheric temperature contrast and tropical climate
Source: Research Square preprint supplement (doi:10.21203/rs.3.rs-6760163/v1), 2025-08-20
Supplement: Supplementary file 1 [file a37526c0241ef2633706bccc.pdf]

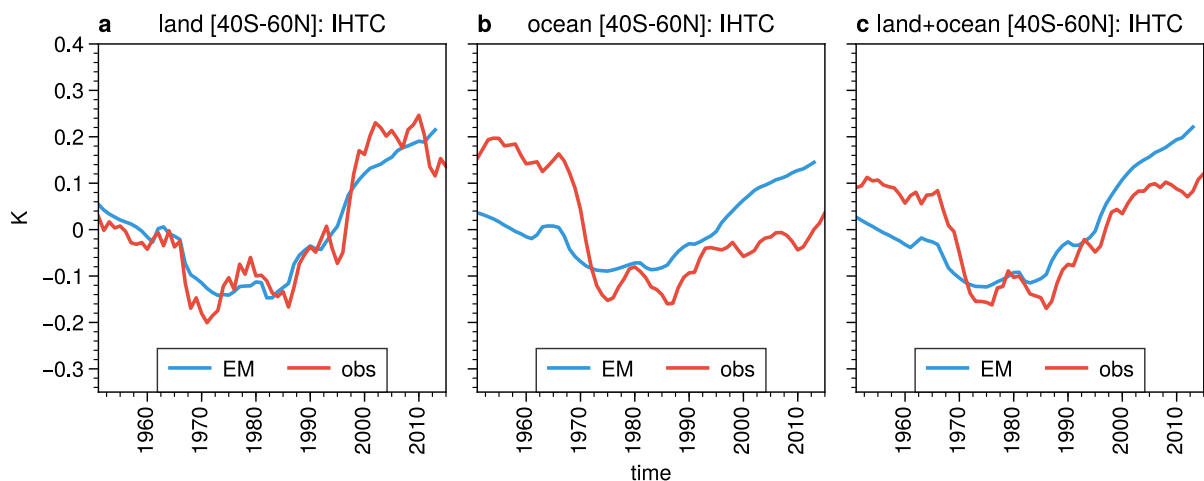

**Extended Data Fig. 1 Interhemispheric surface temperature contrast in the model and observation. a,** land surface temperature contrast. **b,** SST. **c,** land and ocean surface temperature contrast. A 7-yr running mean has been applied to time series for presentation.

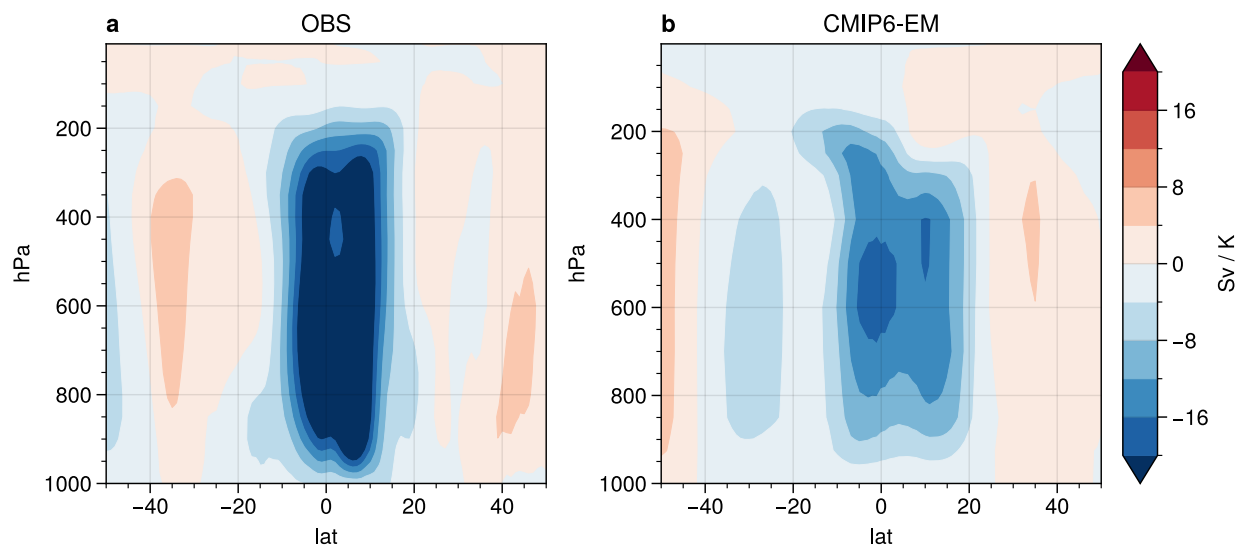

**Extended Data Fig. 2 Regression of overturning mass streamfunction on the IHTC in observation (a) and model (b).**  $1\text{Sv} = 10^9 \text{ kg/s}$ . Positive values indicate clockwise overturning circulation.

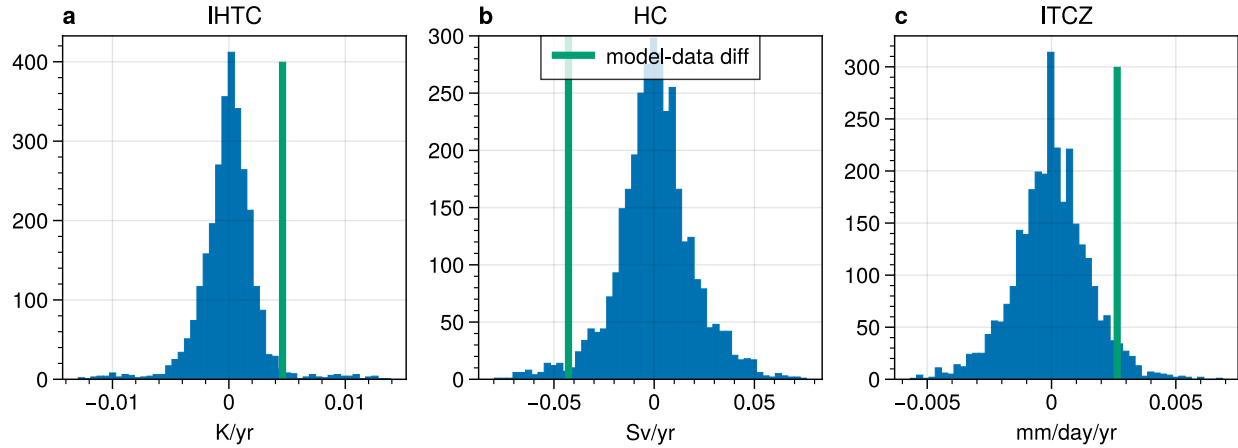

**Extended Data Fig. 3 Comparison of model-data difference with modeled internal variability. a, IHTC. b, HC. c, ITCZ.** We calculated distributions from 34 CMIP6 models with at least 200 years of preindustrial control simulations. To remove long-term drift, we detrended the entire time series for each model. Next, we randomly selected a continuous 65-year time series and calculated trends. This process was repeated 100 times for each model, resulting in a total of 3400 realizations. For the IHTC, 153 out of 3400 realizations (~4.5%) show a trend with an absolute value (two-tail) greater than the model-data difference. For the HC, 154 out of 3400 realizations (~4.5%) show a trend with an absolute value greater than the model-data difference. For the ITCZ, 261 out of 3400 realizations (~7.5%) show a trend with an absolute value greater than the model-data difference. Given the IHTC, HC, and ITCZ are a highly coupled system, only 51 out of 3400 realizations (~1.5%) show a trend with an absolute value greater than the model-data difference collectively.

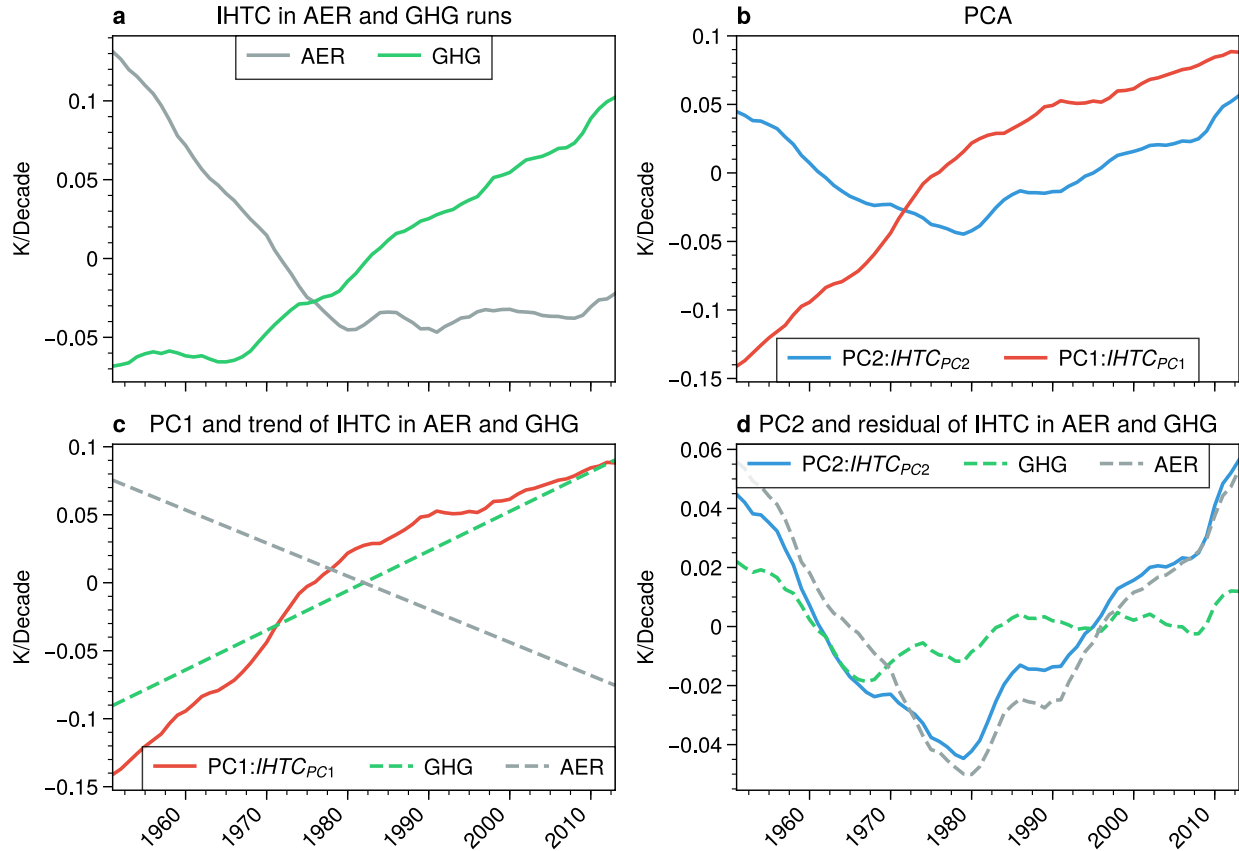

**Extended Data Fig. 4 PCA on IHTCs in AER and GHG runs. a,** forced IHTC due to AER and GHG. **b,** PCs of IHTC in **a**. **c,** PC1 and linear trend of the IHTC in AER and GHG. **d,** PC2 and detrended (or multidecadal) IHTC in AER and GHG. The loading has been normalized to unit variance, so the PC shown here has absolute unit.

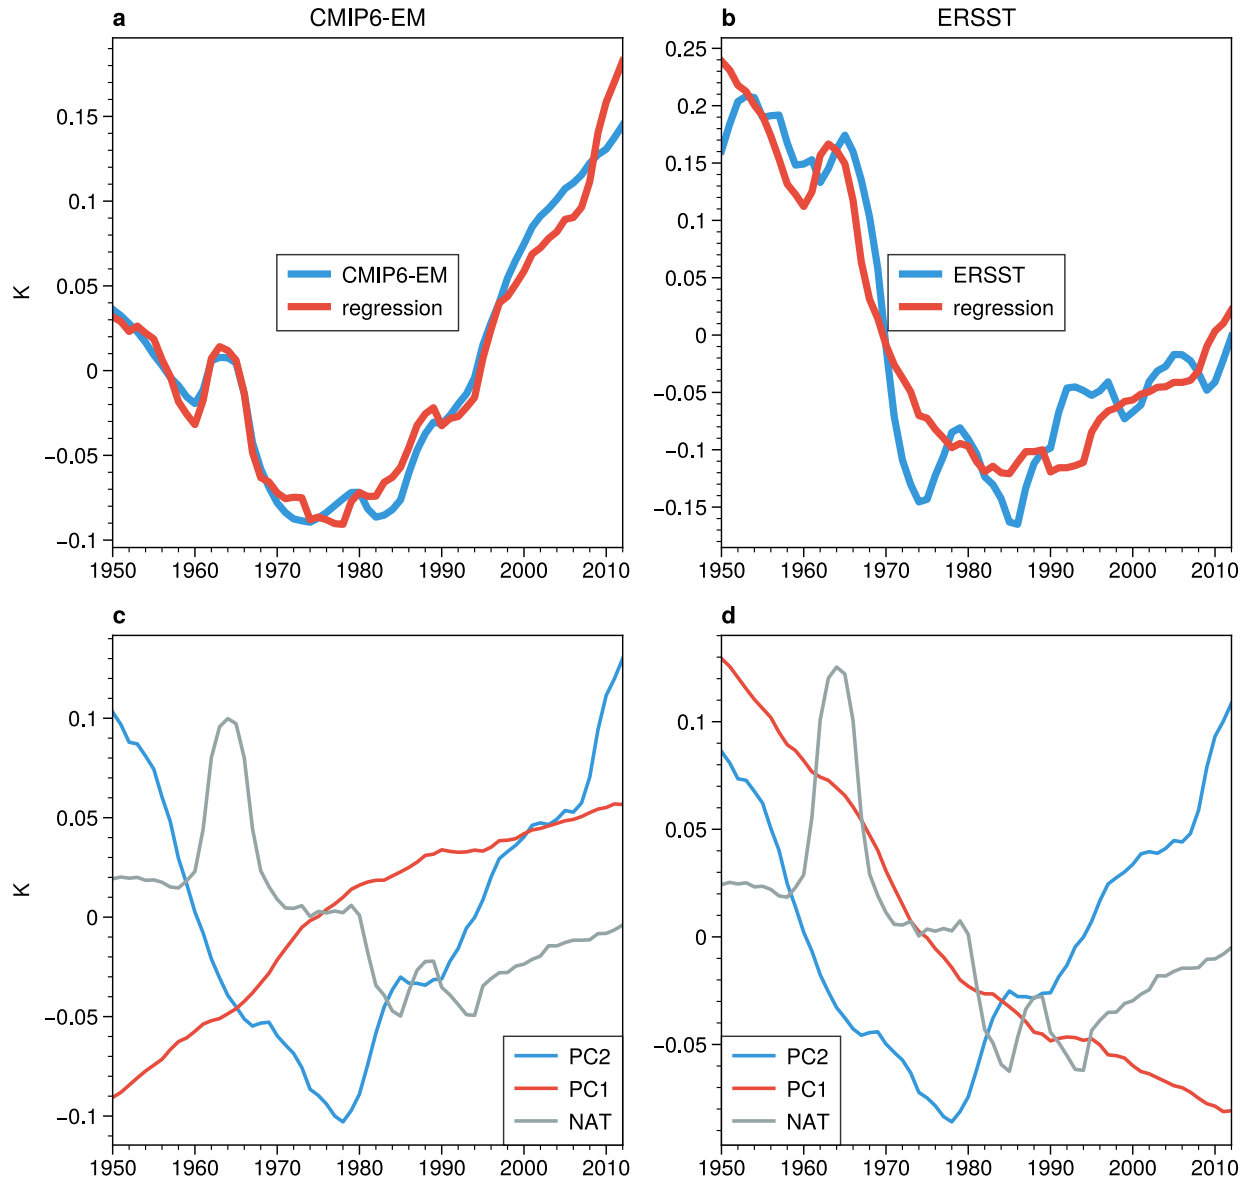

**Extended Data Fig. 5 Decomposition of Equation 2.** **a**, IHTC and its regression in the model. **b**, as in **a**, but for ERSSTv5. **c**, decomposition of the regression in the model. **d**, as in **c**, but for ERSSTv5.

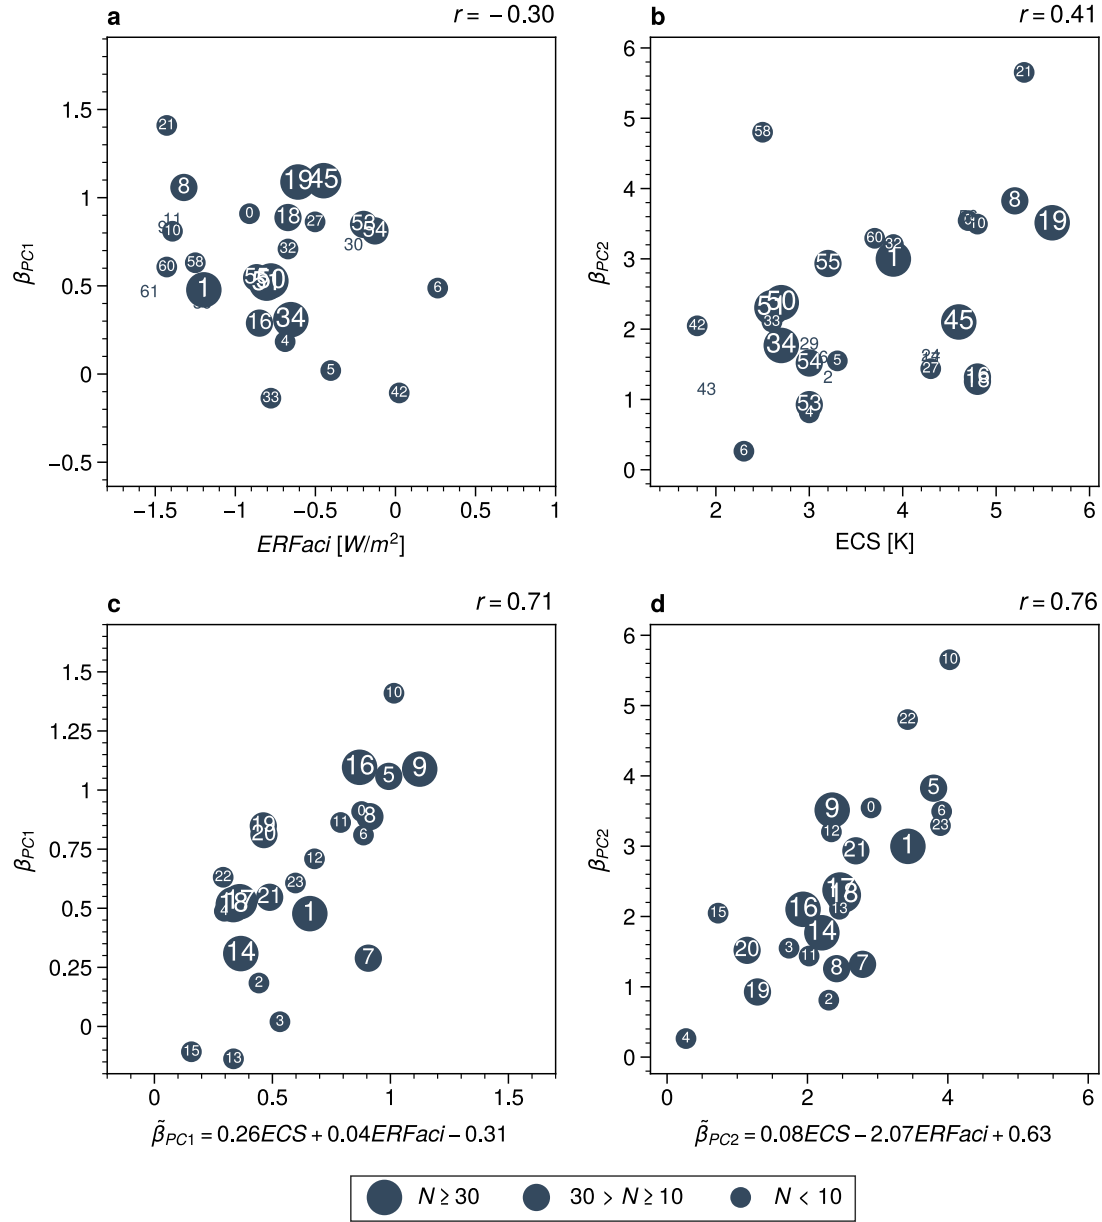

**Extended Data Fig. 6 Relationship between long-term trends and multidecadal variability in CMIP6 models' IHTC with their responses to GHG and AER.** **a**, scatterplot showing the relationship between  $\beta_{PC1}$  and ERFaci. **b**, scatterplot showing the relationship between  $\beta_{PC2}$  and ECS. **c**, scatterplot showing the relationship between  $\beta_{PC1}$  and regression of  $\beta_{PC1}$  onto ECS and ERFaci. **d**, scatterplot showing the relationship between  $\beta_{PC2}$  and regression of  $\beta_{PC2}$  onto ECS and ERFaci. Models are divided into two groups: those with ECS and ERFaci available (circled) and those with either ECS or ERFaci (non-circled). Circle sizes are proportional to each model's ensemble size (legend). Correlations in **a** and **b** are calculated using circled models, and they remain almost the same if including non-circled models.

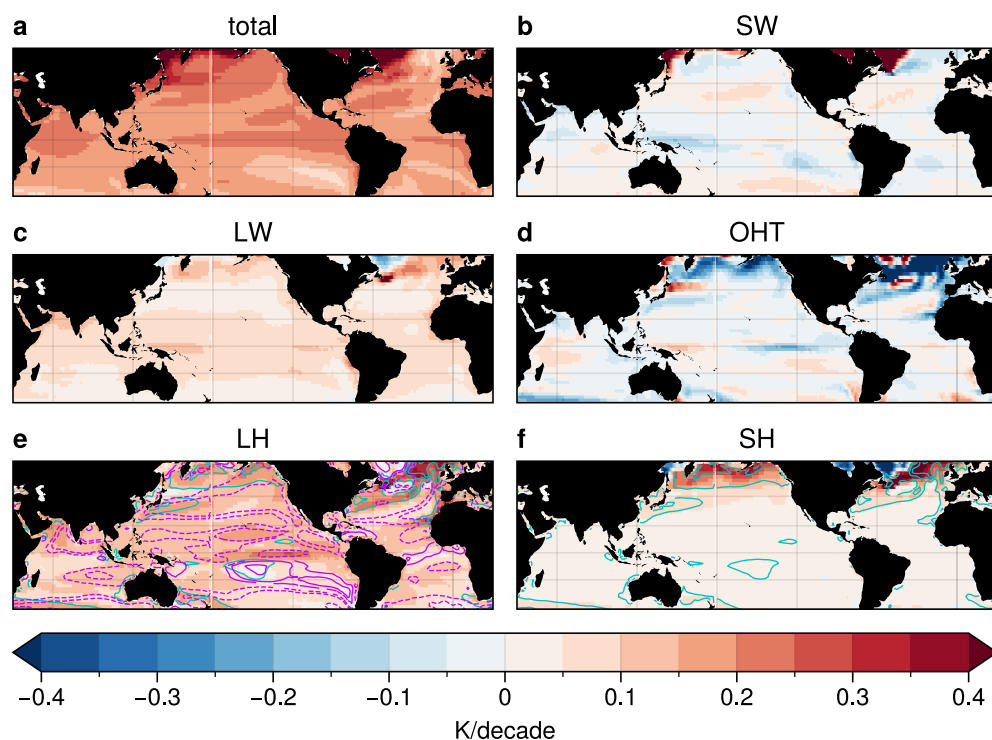

**Extended Data Fig. 7 Energy budget analysis for the global SST trend during 1950-2014 in CMIP6 GHG run.** **a**, total SST trend. **b**, SST trend due to changes in shortwave. **c**, **d**, **e**, and **f** as in **b** but for longwave, ocean dynamics, latent heat and sensible heat, respectively. The trend of the air-sea temperature difference is plotted in cyan contours in **e** and **f**. The surface wind speed trend is plotted in purple contours in **e**, with positive (negative) change in solid (dashed) line.

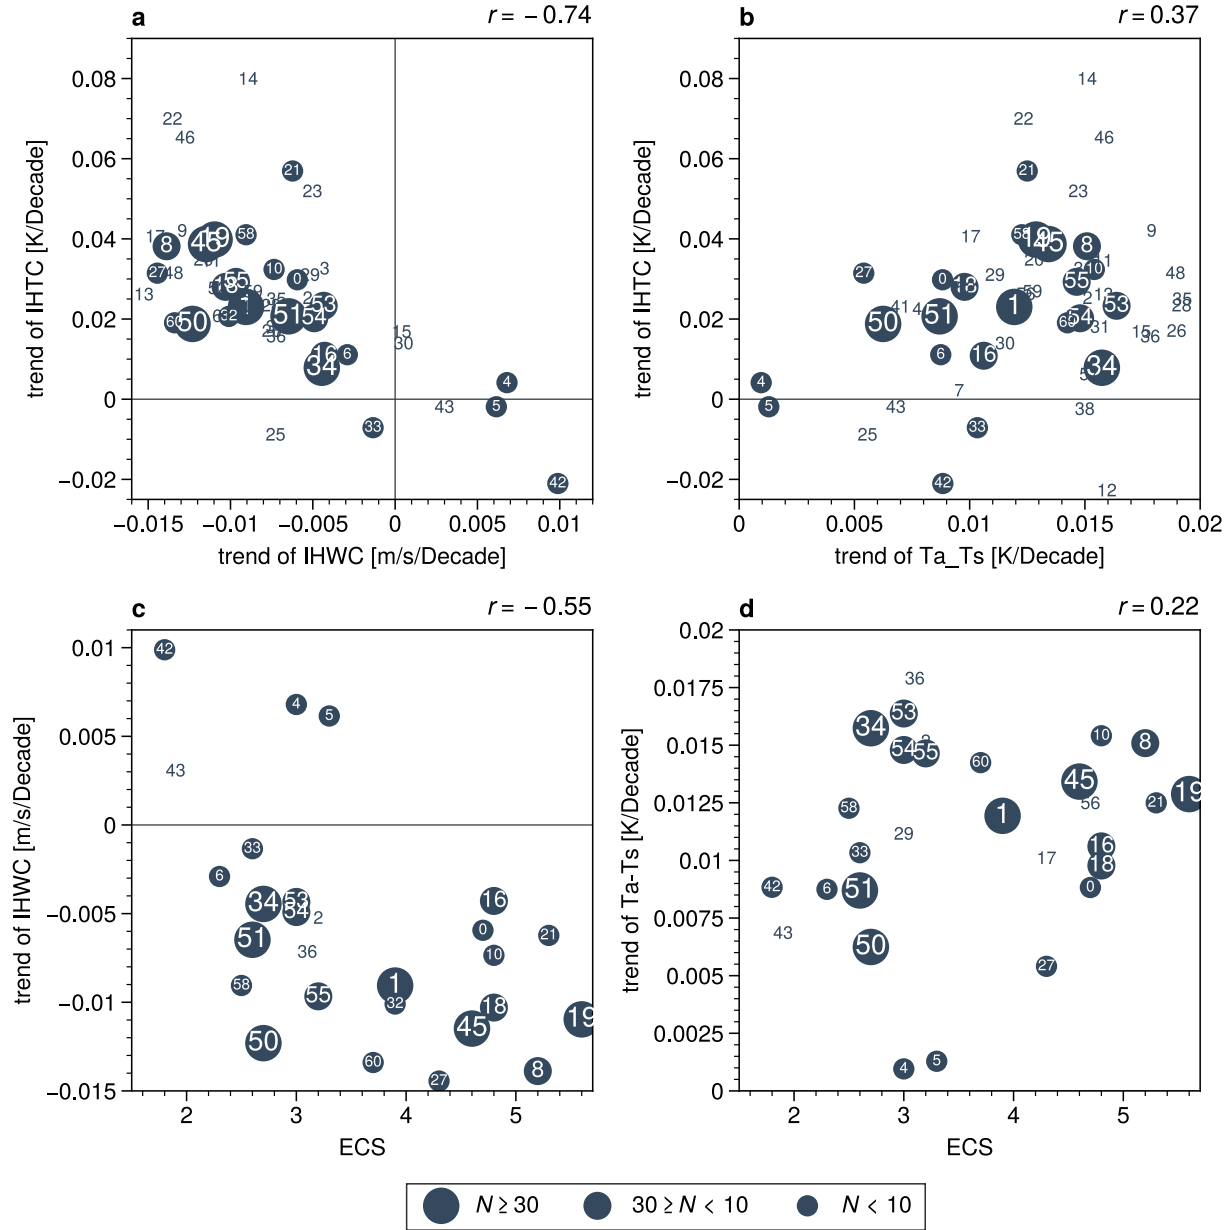

**Extended Data Fig. 8** Scatterplot illustrating the relationship between IHTC, IHWC, air-sea temperature difference, and ECS in CMIP6 models. **a**, trends of IHTC and IHWC. **b**, trends of IHTC and air-sea temperature difference. **c**, ECS and trend of IHWC. **d**, ECS and trend of air-sea temperature difference. The trends are calculated in 1950-2014. The correlation shown in top-right corner is calculated using 24 models that have both ECS and ERFaci available. The correlation in **a** decreases slightly from -0.74 to -0.62, and in **b** it decreases from 0.37 to 0.27 when calculated using all models instead of just the circled ones. In **c** and **d**, the correlation remains almost the same when using all models.



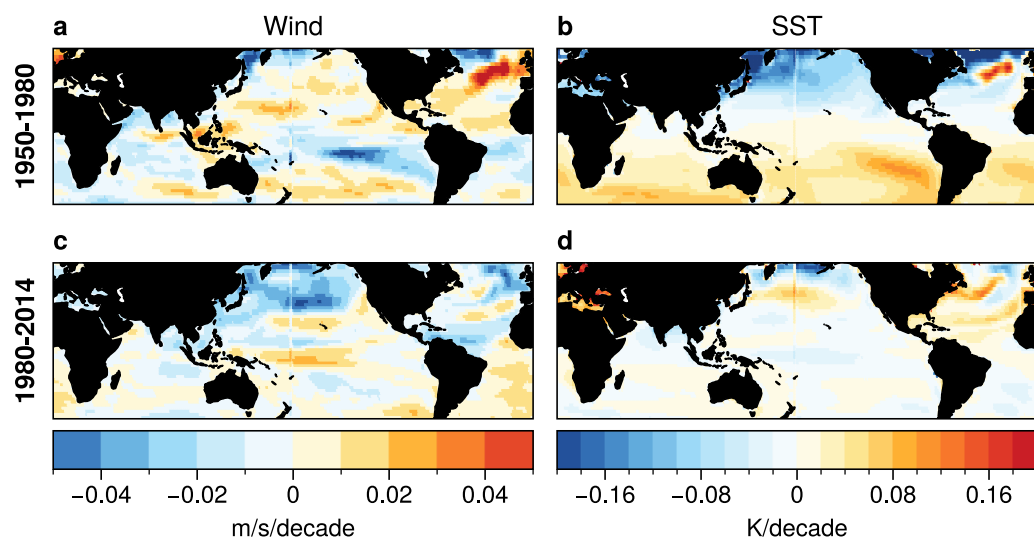

**Extended Data Fig. 9 Linear trend of surface wind speed and SST in AER simulations. a,** AER-induced surface wind speed trend in 1950-1980. **b,** as in **a** but for SST. **c, d** as in **a, b** but for 1980-2014. Note that in **b** and **d**, the global mean SST have been removed to emphasize the NH-SH gradient.

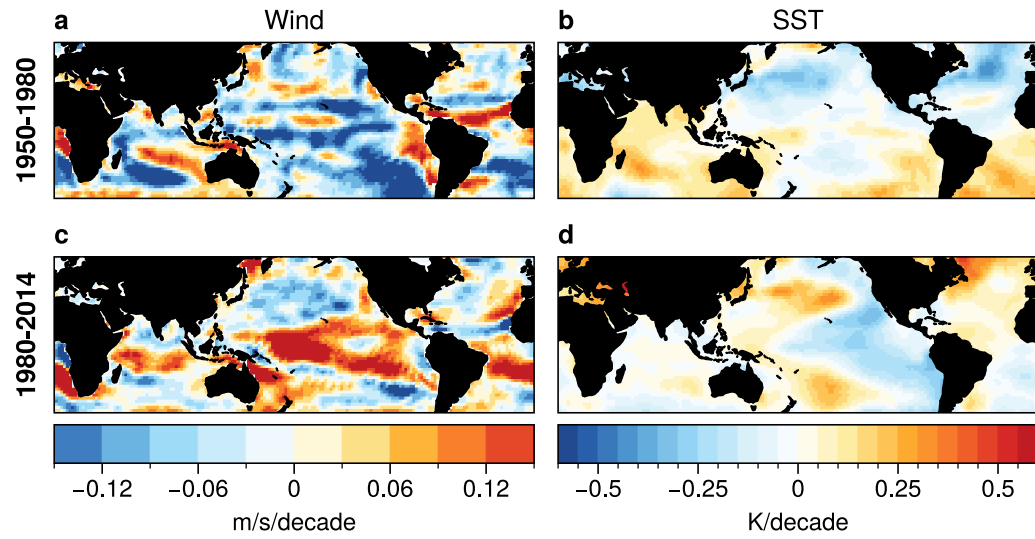

**Extended Data Fig. 10, as in Extended Data Fig. 9, but for observation (ERSSTv5 and 20<sup>th</sup> century reanalysis).**

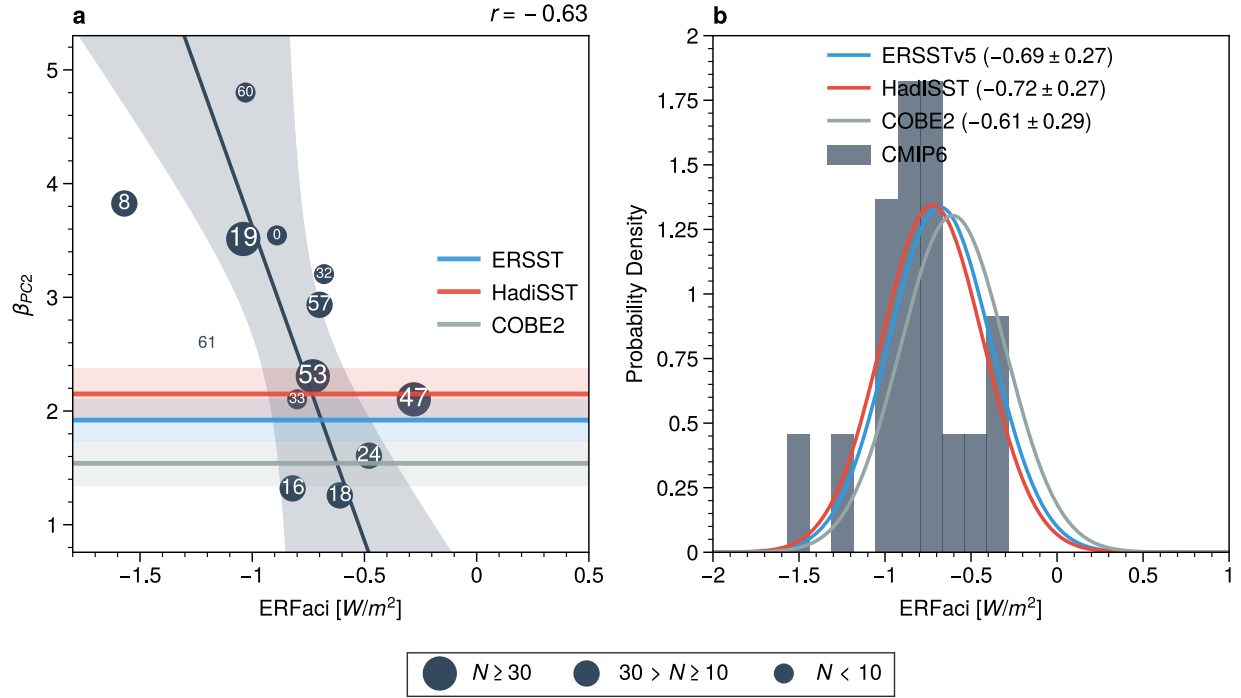

**Extended Data Fig. 11 Emergent constraint on the ERFaci in real world. a,** scatterplot between  $\beta_{PC2}$  and ERFaci. **b,** probability density function for ERFaci in both models and observations. In panel **a**, the solid dark line represents the best-fit linear regression of ERFaci on  $\beta_{PC2}$  across the model ensemble, with prediction error indicated by dark shadings. Horizontal lines denote the best-estimated  $\beta_{PC2}$  from various observations, with shading indicating one standard deviation.
